# Supplementary material
Source: PubMed Central journal article supplement (PMC6150435)
Supplement: DC180680SupplementaryData.pdf [file DC180680SupplementaryData.pdf]

## SUPPLEMENTARY DATA

### Online-Only Supplementary Material

**Supplementary Table S1 – Criteria for initiation of rescue therapy during the randomized treatment and extension periods**

| <b>Study period</b>  | <b>Central laboratory measure</b>             | <b>Time window</b>                                                                                             |
|----------------------|-----------------------------------------------|----------------------------------------------------------------------------------------------------------------|
| Randomized treatment | Confirmed FPG >15 mmol/L (>270 mg/dL)         | From week 8, inclusive, up to and including the day before week 12                                             |
|                      | Confirmed FPG >13.2 mmol/L (>240 mg/dL)       | From week 12, inclusive, up to and including the day before week 20                                            |
|                      | Confirmed FPG >11.1 mmol/L (>200 mg/dL)       | From week 20, inclusive, up to and including week 28 and all unscheduled visits through the day before week 36 |
| Extension            | Single HbA <sub>1c</sub> >8.0% (>64 mmol/mol) | From the day of week 36 up to and including week 52 and all unscheduled visits through the day before week 65  |

FPG, fasting plasma glucose; HbA<sub>1c</sub>, glycated hemoglobin.

**Supplementary Table S2 – Percent of dispensed study medication used over the 52 weeks**

|                                                       | <b>Exenatide QW +<br/>dapagliflozin<br/>(n=231)</b> | <b>Exenatide QW +<br/>placebo (n=230)</b> | <b>Dapagliflozin +<br/>placebo (n=233)</b> | <b>Total (N=694)</b> |
|-------------------------------------------------------|-----------------------------------------------------|-------------------------------------------|--------------------------------------------|----------------------|
| % of dispensed exenatide QW or matching placebo used  |                                                     |                                           |                                            |                      |
| Mean (SD)                                             | 95.65 (17.82)                                       | 93.05 (16.08)                             | 91.60 (15.16)                              | 93.42 (16.45)        |
| % received, <i>n</i> (%)                              |                                                     |                                           |                                            |                      |
| <80%                                                  | 20 (8.7)                                            | 30 (13.0)                                 | 28 (12.0)                                  | 78 (11.2)            |
| 80 to <120%                                           | 206 (89.2)                                          | 197 (85.7)                                | 205 (88.0)                                 | 608 (87.6)           |
| ≥120%                                                 | 5 (2.2)                                             | 3 (1.3)                                   | 0                                          | 8 (1.2)              |
| % of dispensed dapagliflozin or matching placebo used |                                                     |                                           |                                            |                      |
| Mean (SD)                                             | 100.81 (19.82)                                      | 99.60 (17.07)                             | 97.21 (13.10)                              | 99.20 (16.93)        |
| % received, <i>n</i> (%)                              |                                                     |                                           |                                            |                      |
| <80%                                                  | 6 (2.6)                                             | 10 (4.3)                                  | 9 (3.9)                                    | 25 (3.6)             |
| 80 to <120%                                           | 209 (90.5)                                          | 205 (89.1)                                | 218 (93.6)                                 | 632 (91.1)           |
| ≥120%                                                 | 16 (6.9)                                            | 15 (6.5)                                  | 6 (2.6)                                    | 37 (5.3)             |

QW, once weekly; SD, standard deviation.

**Supplementary Table S3 – Demographic and baseline characteristics**

|                                               | <b>Exenatide QW +<br/>dapagliflozin<br/>(n=228)</b> | <b>Exenatide QW +<br/>placebo (n=227)</b> | <b>Dapagliflozin +<br/>placebo (n=230)</b> |
|-----------------------------------------------|-----------------------------------------------------|-------------------------------------------|--------------------------------------------|
| Age, mean (SD), years                         | 53.8 (9.8)                                          | 54.2 (9.6)                                | 54.5 (9.2)                                 |
| Male, <i>n</i> (%)                            | 102 (44.7)                                          | 116 (51.1)                                | 110 (47.8)                                 |
| Race, <i>n</i> (%)                            |                                                     |                                           |                                            |
| White                                         | 190 (83.3)                                          | 194 (85.5)                                | 189 (82.2)                                 |
| Black                                         | 34 (14.9)                                           | 27 (11.9)                                 | 33 (14.3)                                  |
| Asian                                         | 3 (1.3)                                             | 1 (0.4)                                   | 1 (0.4)                                    |
| Other                                         | 1 (0.4)                                             | 5 (.22)                                   | 7 (3.0)                                    |
| Hispanic ethnicity, <i>n</i> (%)              | 95 (41.7)                                           | 91 (40.1)                                 | 85 (37.0)                                  |
| Weight, mean (SD), kg                         | 91.8 (22.2)                                         | 89.8 (20.2)                               | 91.1 (19.7)                                |
| BMI, mean (SD), kg/m <sup>2</sup>             | 33.2 (6.8)                                          | 32.0 (5.9)                                | 33.0 (6.1)                                 |
| BMI group, <i>n</i> (%)                       |                                                     |                                           |                                            |
| <25 kg/m <sup>2</sup>                         | 17 (7.5)                                            | 17 (7.5)                                  | 15 (6.5)                                   |
| ≥25 to <30 kg/m <sup>2</sup>                  | 71 (31.1)                                           | 78 (34.4)                                 | 57 (24.8)                                  |
| ≥30 kg/m <sup>2</sup>                         | 140 (61.4)                                          | 132 (58.1)                                | 158 (68.7)                                 |
| HbA <sub>1c</sub> , mean (SD), %              | 9.3 (1.1)                                           | 9.3 (1.1)                                 | 9.3 (1.0)                                  |
| HbA <sub>1c</sub> , mean (SD), mmol/mol       | 79 (11.7)                                           | 78 (11.6)                                 | 78 (11.3)                                  |
| HbA <sub>1c</sub> group, <i>n</i> (%)         |                                                     |                                           |                                            |
| <8.0% [ $<64$ mmol/mol]                       | 14 (6.1)                                            | 13 (5.7)                                  | 14 (6.1)                                   |
| ≥8.0% to <9.0% [ $\geq 64$ to $<75$ mmol/mol] | 84 (36.8)                                           | 84 (37.0)                                 | 88 (38.3)                                  |
| ≥9.0% [ $\geq 75$ mmol/mol]                   | 130 (57.0)                                          | 130 (57.3)                                | 128 (55.7)                                 |
| Type 2 diabetes duration, mean (SD), years    | 7.6 (6.0)                                           | 7.4 (5.5)                                 | 7.1 (5.5)                                  |
| FPG, mean (SD), mmol/L                        | 11.0 (3.0)                                          | 10.7 (2.8)                                | 10.6 (2.6)                                 |
| SBP, mean (SD), mmHg                          | 130.1 (12.7)                                        | 129.1 (13.1)                              | 130.0 (12.9)                               |
| eGFR, mean (SD), mL/min/1.73 m <sup>2</sup> * | 97.7 (23.7)                                         | 99.4 (26.8)                               | 97.5 (24.0)                                |
| eGFR group, <i>n</i> (%)                      |                                                     |                                           |                                            |
| ≥30 to <60 mL/min/1.73 m <sup>2</sup>         | 6 (2.6)                                             | 7 (3.1)                                   | 12 (5.2)                                   |
| ≥60 mL/min/1.73 m <sup>2</sup>                | 222 (97.4)                                          | 220 (96.9)                                | 218 (94.8)                                 |

To convert FPG from mmol/L to mg/dL, divide by 0.0555.

\*Calculated using the Modification of Diet in Renal Disease equation.

DBP, diastolic blood pressure; eGFR, estimated glomerular filtration rate; FPG, fasting plasma glucose; HbA<sub>1c</sub>, glycated hemoglobin; QW, once weekly; SBP, systolic blood pressure; SD, standard deviation.

SUPPLEMENTARY DATA

**Supplementary Table S4 – Other exploratory efficacy endpoints at week 52 in the intention-to-treat patient population**

|                           | Exenatide QW +<br>dapagliflozin<br>(n=228) | Exenatide QW +<br>placebo (n=227) | Dapagliflozin +<br>placebo (n=230) | Between-group difference (95% CI)                          |                                                             |
|---------------------------|--------------------------------------------|-----------------------------------|------------------------------------|------------------------------------------------------------|-------------------------------------------------------------|
|                           |                                            |                                   |                                    | Exenatide QW + dapagliflozin<br>vs. exenatide QW + placebo | Exenatide QW + dapagliflozin<br>vs. dapagliflozin + placebo |
| Mean daily SMBG, mmol/L   |                                            |                                   |                                    |                                                            |                                                             |
| Baseline                  | 11.34 (2.40)                               | 11.01 (2.06)                      | 11.20 (2.36)                       |                                                            |                                                             |
| Week 28                   | 8.47 (1.69)                                | 8.89 (1.79)                       | 8.93 (1.64)                        |                                                            |                                                             |
| Change at week 28         | -2.71 (0.13)                               | -2.18 (0.14)                      | -2.23 (0.13)                       | -0.53 (-0.85 to -0.21); <i>P</i> =0.001                    | -0.48 (-0.80 to -0.17); <i>P</i> =0.003                     |
| Week 52                   | 8.26 (1.55)                                | 8.63 (1.69)                       | 8.86 (1.99)                        |                                                            |                                                             |
| Change at week 52         | -2.85 (0.15)                               | -2.36 (0.16)                      | -2.18 (0.15)                       | -0.49 (-0.87 to -0.11); <i>P</i> =0.011                    | -0.67 (-1.05 to -0.29); <i>P</i> <0.001                     |
| Waist circumference, cm   |                                            |                                   |                                    |                                                            |                                                             |
| Baseline                  | 108.31 (15.42)                             | 107.46 (17.05)                    | 109.01 (16.22)                     |                                                            |                                                             |
| Week 28                   | 106.57 (15.42)                             | 104.92 (13.78)                    | 107.25 (15.94)                     |                                                            |                                                             |
| Change at week 28         | -1.60 (0.70)                               | -2.68 (0.74)                      | -1.49 (0.70)                       | +1.08 (-0.67 to +2.84); <i>P</i> =0.225                    | -0.11 (-1.83 to +1.61); <i>P</i> =0.902                     |
| Week 52                   | 106.33 (17.63)                             | 105.63 (15.19)                    | 105.00 (15.23)                     |                                                            |                                                             |
| Change at week 52         | -2.01 (1.01)                               | -1.76 (1.07)                      | -3.58 (1.04)                       | -0.25 (-2.84 to +2.34); <i>P</i> =0.850                    | +1.57 (-0.99 to +4.13); <i>P</i> =0.229                     |
| DBP, mmHg                 |                                            |                                   |                                    |                                                            |                                                             |
| Baseline                  | 78.7 (7.7)                                 | 78.4 (8.0)                        | 78.0 (8.1)                         |                                                            |                                                             |
| Week 28                   | 78.8 (7.5)                                 | 79.4 (7.8)                        | 77.8 (8.4)                         |                                                            |                                                             |
| Change at week 28         | -0.2 (0.5)                                 | +0.3 (0.5)                        | -0.8 (0.5)                         | -0.5 (-1.9 to +1.0); <i>P</i> =0.520                       | +0.6 (-0.8 to +2.0); <i>P</i> =0.404                        |
| Week 52                   | 77.8 (7.7)                                 | 79.6 (8.1)                        | 78.5 (9.1)                         |                                                            |                                                             |
| Change at week 52         | -0.7 (0.6)                                 | +0.2 (0.7)                        | -0.8 (0.7)                         | -0.9 (-2.7 to +0.8); <i>P</i> =0.310                       | +0.1 (-1.7 to +1.8); <i>P</i> =0.929                        |
| Total cholesterol, mmol/L |                                            |                                   |                                    |                                                            |                                                             |
| Baseline                  | 4.85 (1.16)                                | 5.00 (1.21)                       | 4.73 (1.05)                        |                                                            |                                                             |
| Week 28                   | 4.90 (1.18)                                | 4.96 (1.10)                       | 4.99 (1.18)                        |                                                            |                                                             |
| Change at week 28         | +0.02 (0.07)                               | -0.04 (0.07)                      | +0.18 (0.07)                       | +0.06 (-0.12 to +0.23); <i>P</i> =0.532                    | -0.16 (-0.33 to +0.01); <i>P</i> =0.067                     |
| Week 52                   | 4.88 (1.12)                                | 4.91 (1.20)                       | 4.86 (1.13)                        |                                                            |                                                             |
| Change at week 52         | +0.10 (0.08)                               | +0.02 (0.09)                      | +0.14 (0.08)                       | +0.08 (-0.13 to +0.28); <i>P</i> =0.458                    | -0.05 (-0.25 to +0.15); <i>P</i> =0.639                     |
| LDL cholesterol, mmol/L   |                                            |                                   |                                    |                                                            |                                                             |
| Baseline                  | 2.70 (0.96)                                | 2.79 (1.06)                       | 2.61 (0.91)                        |                                                            |                                                             |
| Week 28                   | 2.79 (0.97)                                | 2.81 (0.97)                       | 2.80 (0.99)                        |                                                            |                                                             |

SUPPLEMENTARY DATA

|                             | Exenatide QW +<br>dapagliflozin<br>(n=228) | Exenatide QW +<br>placebo (n=227) | Dapagliflozin +<br>placebo (n=230) | Between-group difference (95% CI)                          |                                                             |
|-----------------------------|--------------------------------------------|-----------------------------------|------------------------------------|------------------------------------------------------------|-------------------------------------------------------------|
|                             |                                            |                                   |                                    | Exenatide QW + dapagliflozin<br>vs. exenatide QW + placebo | Exenatide QW + dapagliflozin<br>vs. dapagliflozin + placebo |
| Change at week 28           | +0.07 (0.06)                               | +0.03 (0.07)                      | +0.14 (0.06)                       | +0.04 (-0.11 to +0.20); P=0.602                            | -0.07 (-0.23 to +0.08); P=0.365                             |
| Week 52                     | 2.74 (0.88)                                | 2.70 (1.02)                       | 2.63 (0.94)                        |                                                            |                                                             |
| Change at week 52           | +0.11 (0.07)                               | +0.02 (0.07)                      | +0.05 (0.07)                       | +0.09 (-0.08 to +0.26); P=0.301                            | +0.06 (-0.11 to +0.23); P=0.473                             |
| HDL cholesterol, mmol/L     |                                            |                                   |                                    |                                                            |                                                             |
| Baseline                    | 1.22 (0.33)                                | 1.22 (0.30)                       | 1.17 (0.27)                        |                                                            |                                                             |
| Week 28                     | 1.27 (0.30)                                | 1.25 (0.32)                       | 1.24 (0.30)                        |                                                            |                                                             |
| Change at week 28           | +0.04 (0.02)                               | +0.02 (0.02)                      | +0.05 (0.02)                       | +0.02 (-0.01 to +0.06); P=0.230                            | -0.01 (-0.05 to +0.03); P=0.565                             |
| Week 52                     | 1.29 (0.33)                                | 1.26 (0.30)                       | 1.24 (0.29)                        |                                                            |                                                             |
| Change at week 52           | +0.07 (0.02)                               | +0.02 (0.02)                      | +0.07 (0.02)                       | +0.05 (+0.01 to +0.10); P=0.028                            | +0.01 (-0.04 to +0.05); P=0.769                             |
| Non-HDL cholesterol, mmol/L |                                            |                                   |                                    |                                                            |                                                             |
| Baseline                    | 3.63 (1.11)                                | 3.78 (1.20)                       | 3.56 (1.04)                        |                                                            |                                                             |
| Week 28                     | 3.63 (1.13)                                | 3.71 (1.10)                       | 3.75 (1.14)                        |                                                            |                                                             |
| Change at week 28           | -0.03 (0.07)                               | -0.06 (0.07)                      | +0.12 (0.07)                       | +0.03 (-0.14 to +0.20); P=0.721                            | -0.15 (-0.32 to +0.01); P=0.074                             |
| Week 52                     | 3.59 (1.06)                                | 3.65 (1.22)                       | 3.62 (1.15)                        |                                                            |                                                             |
| Change at week 52           | +0.01 (0.08)                               | -0.01 (0.09)                      | +0.08 (0.08)                       | +0.03 (-0.18 to +0.23); P=0.807                            | -0.07 (-0.27 to +0.14); P=0.507                             |
| Triglycerides, mmol/L       |                                            |                                   |                                    |                                                            |                                                             |
| Baseline                    | 2.12 (1.25)                                | 2.24 (1.31)                       | 2.13 (1.26)                        |                                                            |                                                             |
| Week 28                     | 1.86 (1.04)                                | 2.06 (1.21)                       | 2.07 (1.15)                        |                                                            |                                                             |
| Change at week 28           | -0.31 (0.08)                               | -0.18 (0.08)                      | -0.11 (0.08)                       | -0.13 (-0.32 to +0.06); P=0.181                            | -0.20 (-0.39 to -0.01); P=0.036                             |
| Week 52                     | 1.89 (1.09)                                | 2.18 (1.67)                       | 2.19 (1.46)                        |                                                            |                                                             |
| Change at week 52           | -0.22 (0.11)                               | -0.06 (0.12)                      | +0.01 (0.12)                       | -0.16 (-0.45 to 0.13); P=0.271                             | -0.23 (-0.52 to +0.06); P=0.114                             |

Data exclude measurements are the initiation of rescue therapy. Baseline, week 28, and week 52 data are mean (standard deviation), change data are least-squares

mean (standard error), and difference data are least-squares mean (95% CI). To convert mg/dL to mmol/L for glucose, divide by 0.0555. To convert mmol/L to

mg/dL for cholesterol, divide by 0.0259. To convert mmol/L to mg/dL for triglycerides, divide by 0.0113. Mean daily SMBG, waist circumference, and DBP

were analyzed using a mixed-effects model for repeated measures; lipid parameters were analyzed using ANCOVA models.

DBP, diastolic blood pressure; QW, once weekly; SMBG, self-monitored blood glucose.

SUPPLEMENTARY DATA

**Supplementary Figure S1** – Study design. HbA<sub>1c</sub>, glycated hemoglobin; ExQW, exenatide once weekly. \*First patient enrolled: 04 September 2014. †Last patient last visit for initial treatment period (28 weeks) plus extension period 1 (24 weeks): 17 October 2016.

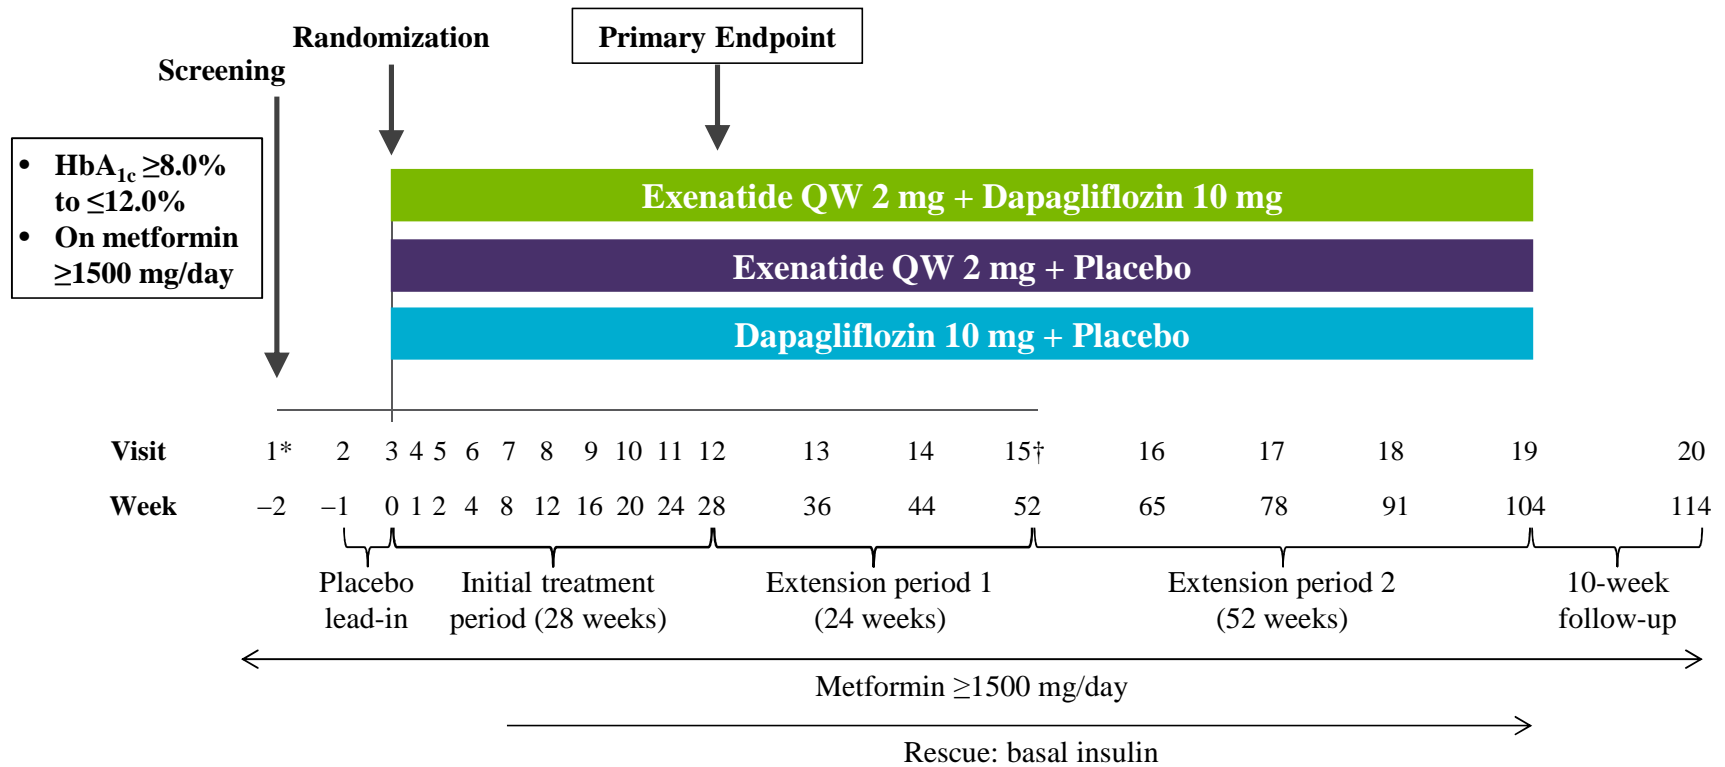

SUPPLEMENTARY DATA

**Supplementary Figure S2** – LSM (SE) change in *A*) HbA<sub>1c</sub>, *B*) FPG, and *C*) weight with time including data from patients who received rescue therapy. Error bars show SEs. To convert FPG from mmol/L to mg/dL, divide by 0.0555. DAPA, dapagliflozin; ExQW, exenatide once weekly; FPG, fasting plasma glucose; HbA<sub>1c</sub>, glycated hemoglobin; LSM, least-squares mean; PBO, placebo; SE, standard error. \**P*<0.05, \*\**P*<0.01, \*\*\**P*<0.001 vs. ExQW + DAPA (*P* values at week 52 are nominal).

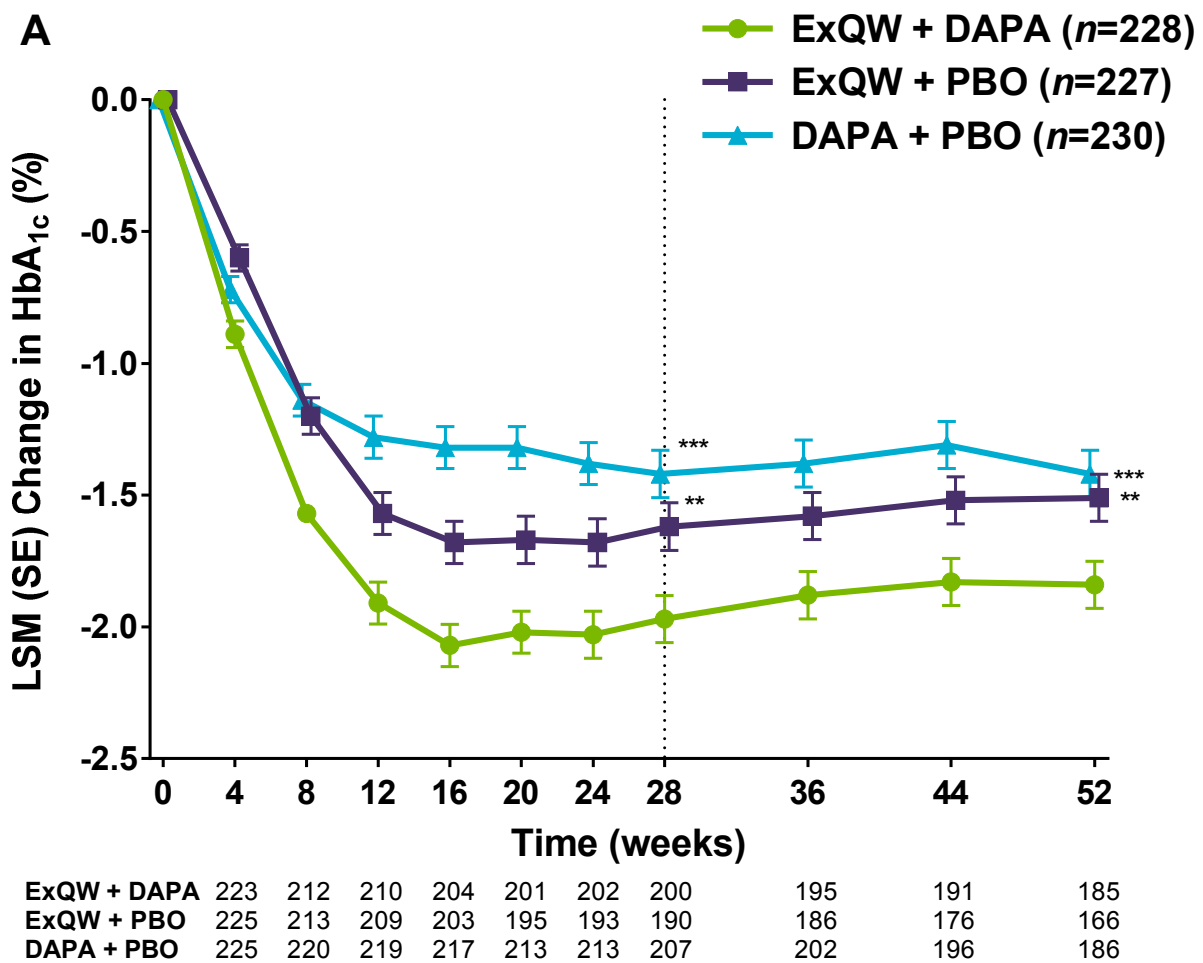

**B**

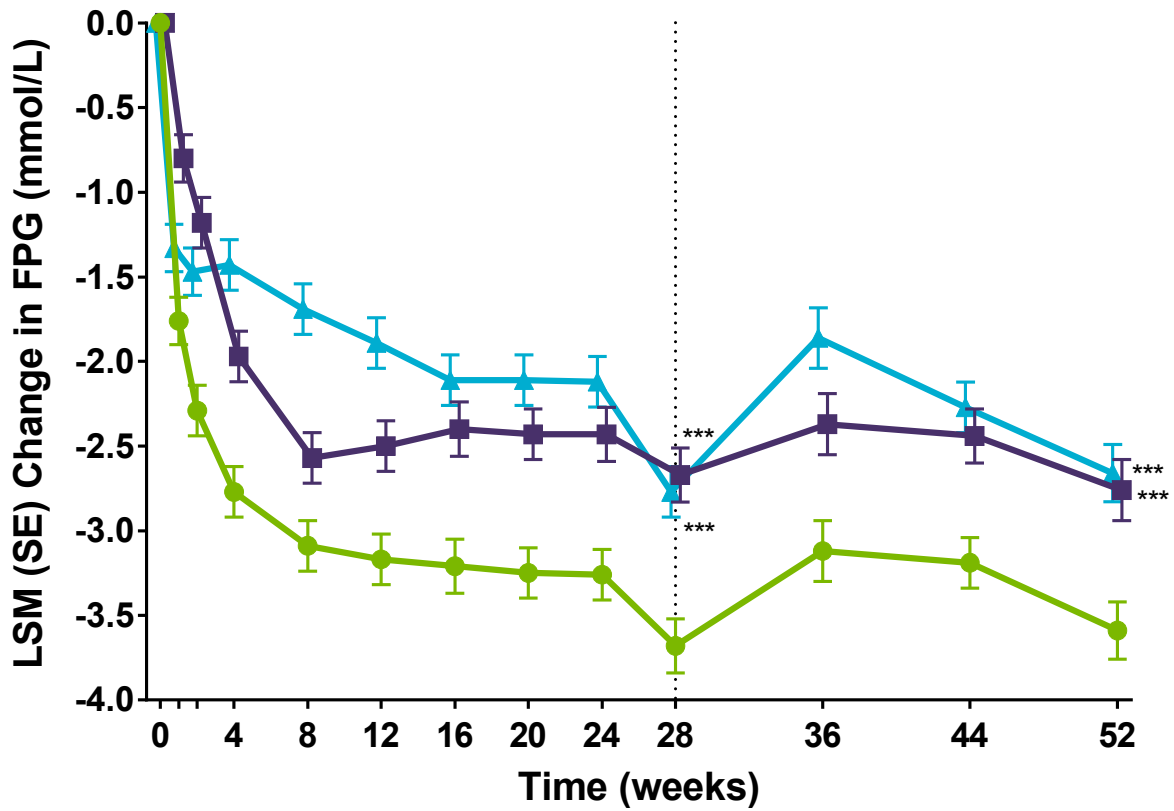

|             |     |     |     |     |     |     |     |     |     |     |
|-------------|-----|-----|-----|-----|-----|-----|-----|-----|-----|-----|
| ExQW + DAPA | 222 | 213 | 211 | 204 | 203 | 201 | 201 | 195 | 191 | 184 |
| ExQW + PBO  | 224 | 214 | 208 | 202 | 196 | 194 | 190 | 185 | 177 | 166 |
| DAPA + PBO  | 225 | 221 | 219 | 218 | 215 | 213 | 207 | 202 | 196 | 184 |



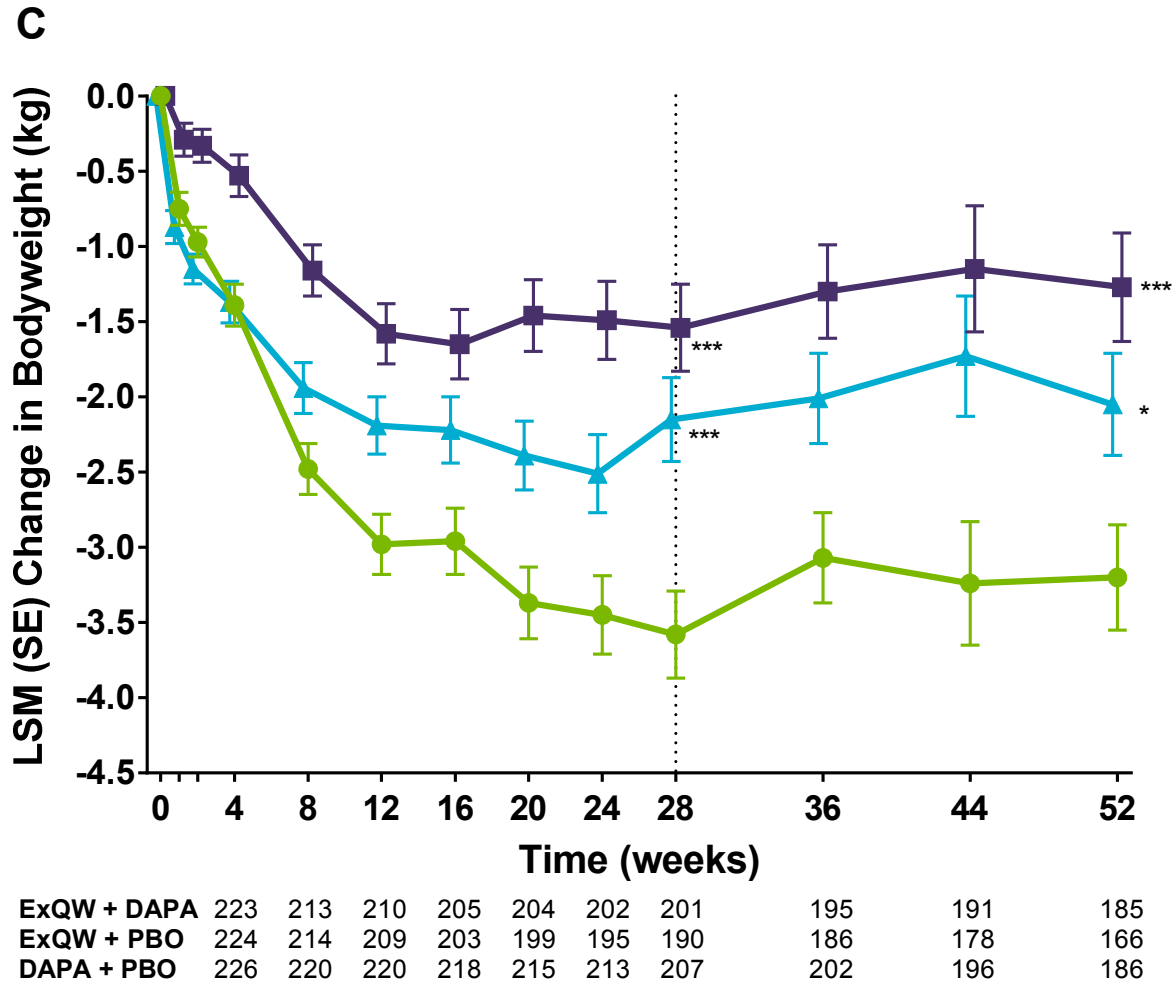

SUPPLEMENTARY DATA

**Supplementary Figure S3** – Kaplan-Meier plot showing the proportion of patients rescued or discontinued for lack of glycemic control during the 52-week treatment period (intention-to-treat population). DAPA, dapagliflozin; ExQW, exenatide once weekly; FPG, fasting plasma glucose; HbA<sub>1c</sub>, glycated hemoglobin; PBO, placebo.

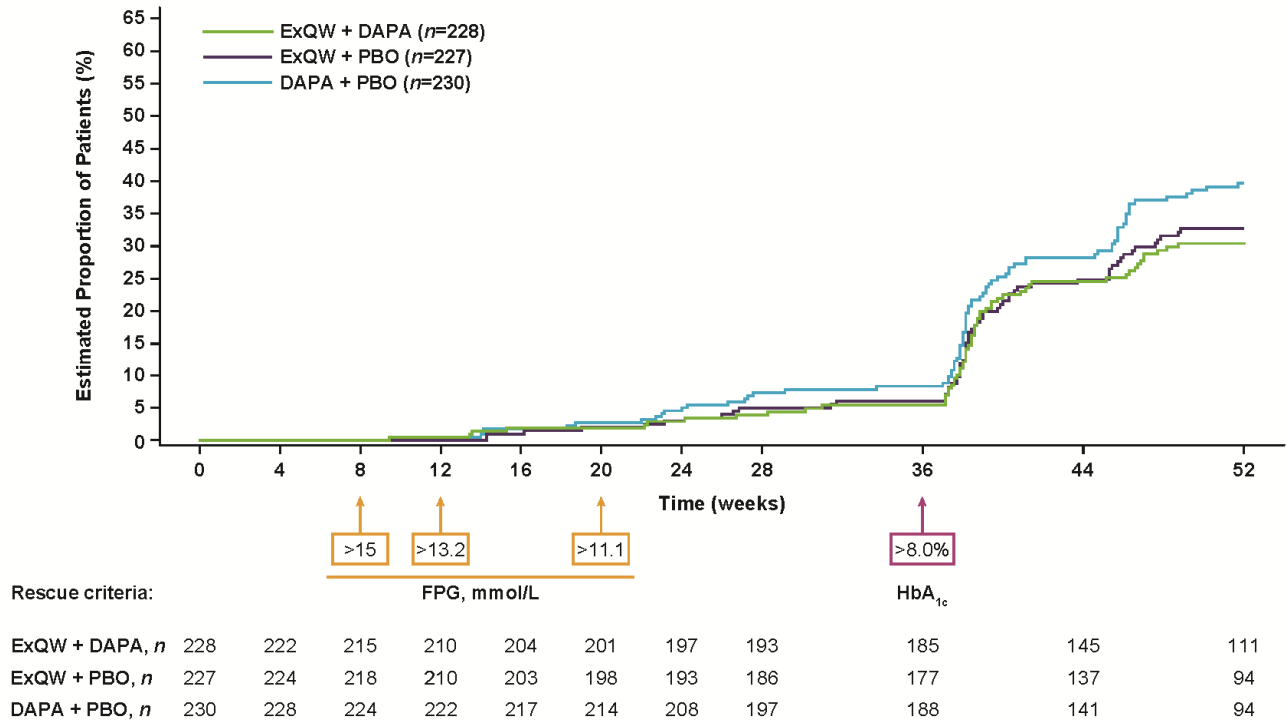

**Supplementary Figure S4** – Mean (SE) change from baseline over time in *A*) eGFR, *B*) hematocrit, and *C*) heart rate. Error bars show SEs. BL, baseline; bpm, beats per minute; DAPA, dapagliflozin; eGFR, estimated glomerular filtration rate; ExQW, exenatide once weekly; PBO, placebo; SE, standard error.

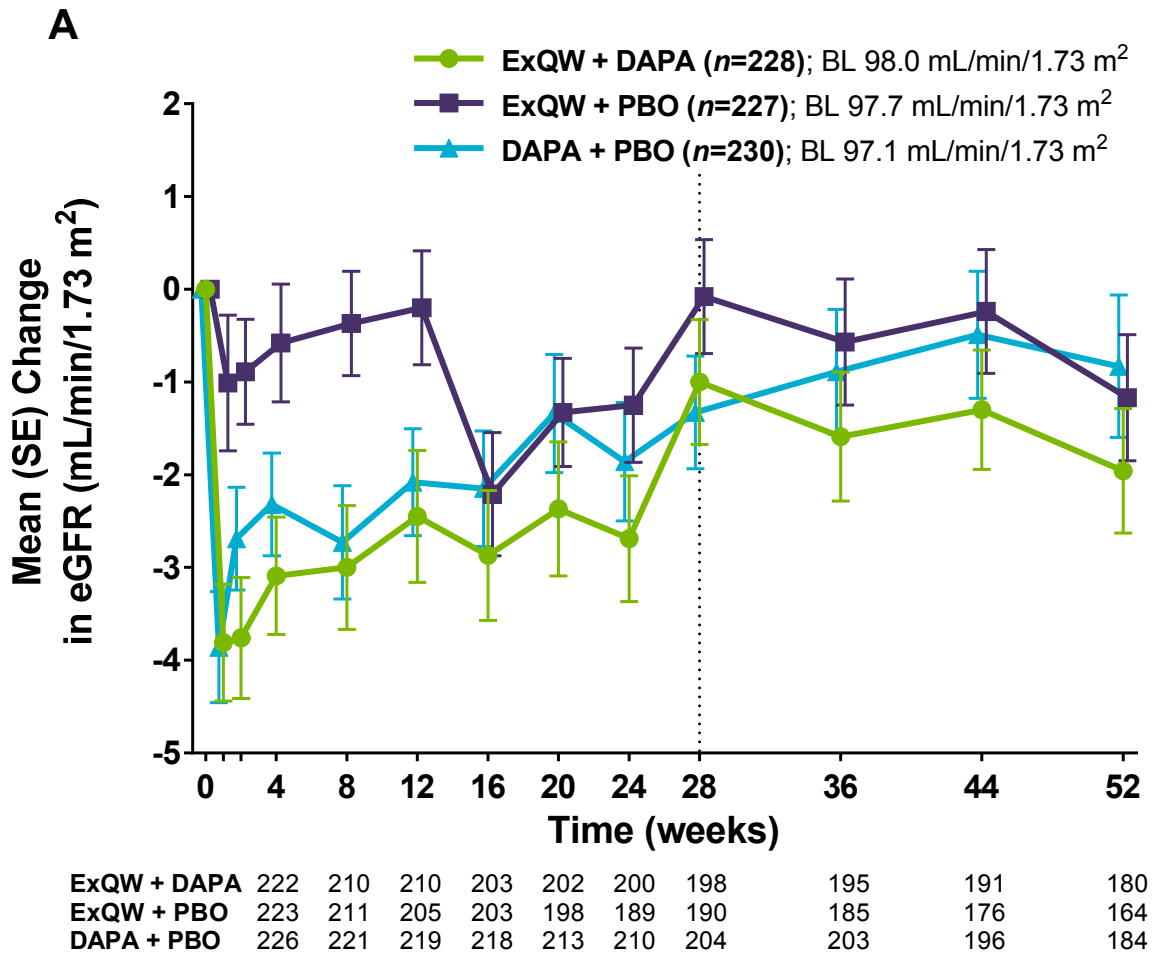

**B**

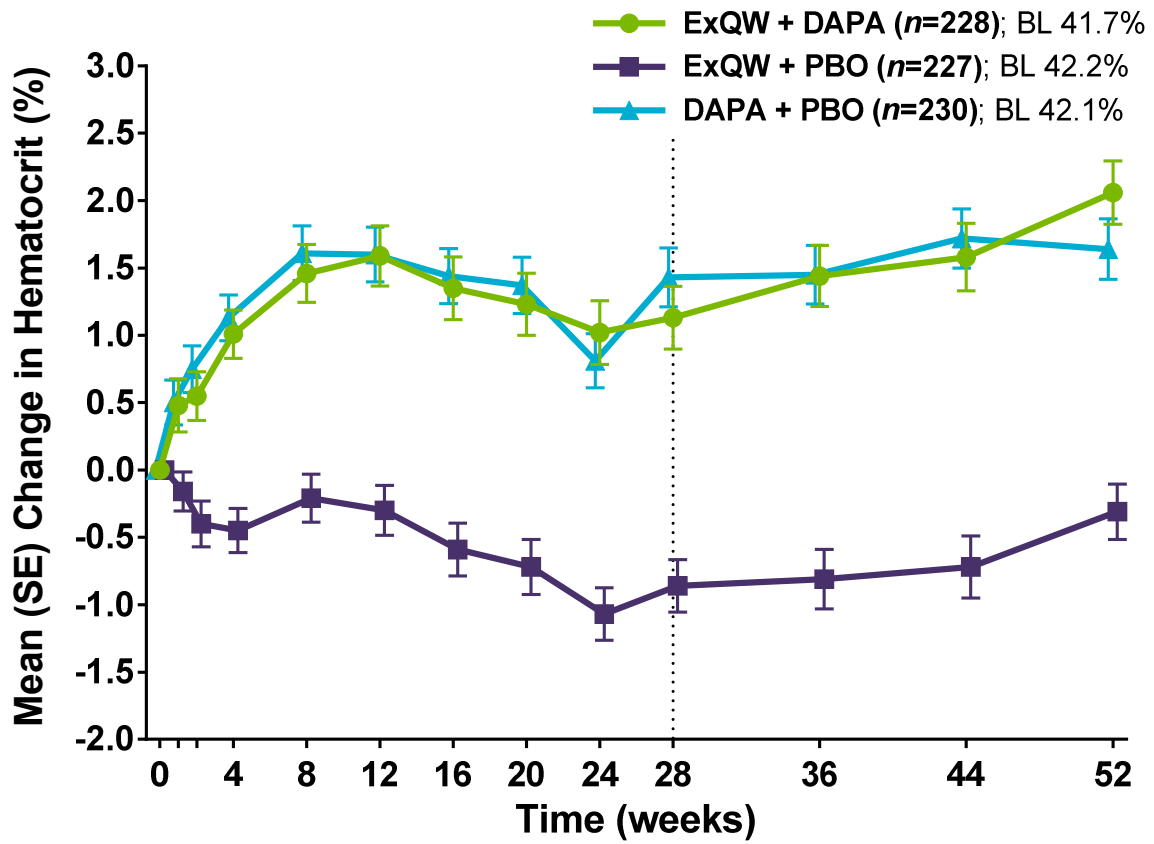

|             |     |     |     |     |     |     |     |     |     |     |
|-------------|-----|-----|-----|-----|-----|-----|-----|-----|-----|-----|
| ExQW + DAPA | 225 | 210 | 208 | 203 | 201 | 201 | 200 | 194 | 189 | 185 |
| ExQW + PBO  | 222 | 214 | 209 | 204 | 198 | 192 | 192 | 185 | 176 | 166 |
| DAPA + PBO  | 223 | 220 | 219 | 215 | 213 | 210 | 205 | 202 | 195 | 185 |

C

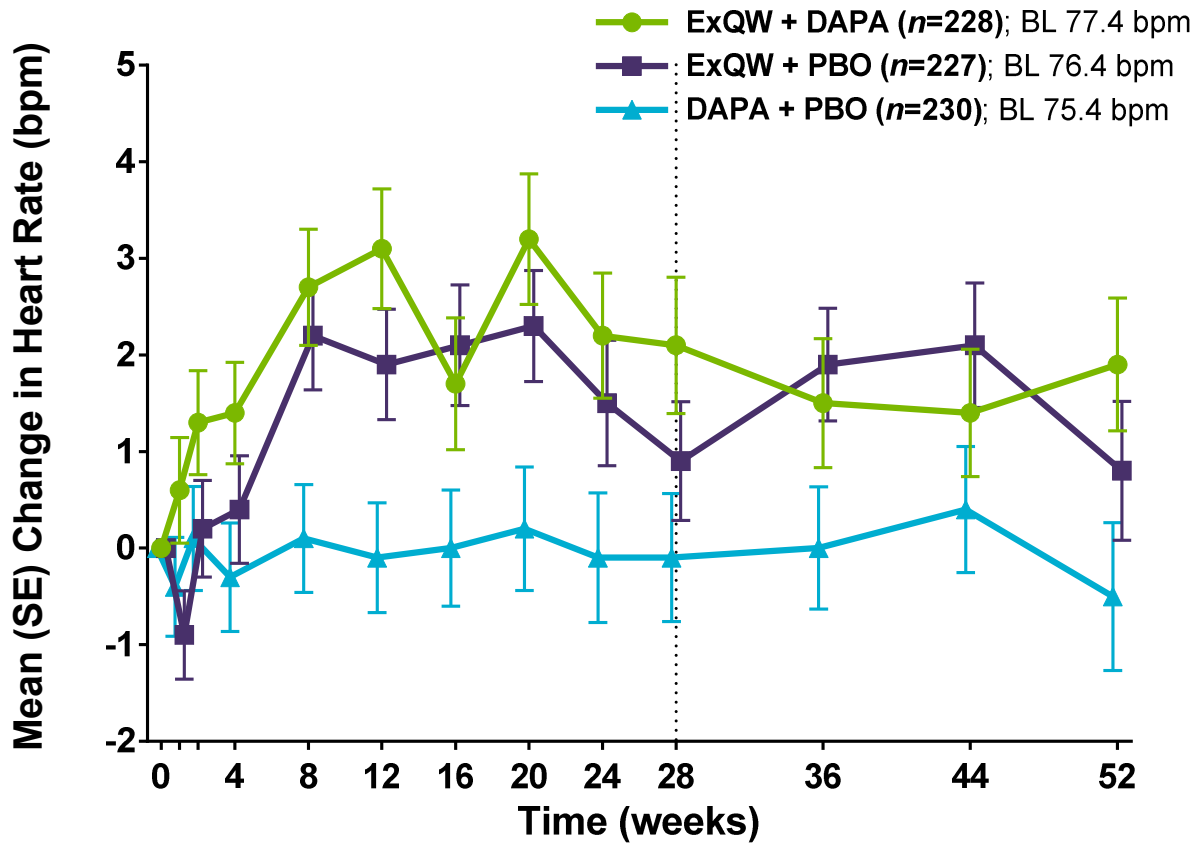

|             |     |     |     |     |     |     |     |     |     |     |
|-------------|-----|-----|-----|-----|-----|-----|-----|-----|-----|-----|
| ExQW + DAPA | 225 | 213 | 211 | 206 | 204 | 202 | 201 | 195 | 191 | 187 |
| ExQW + PBO  | 225 | 216 | 210 | 204 | 199 | 195 | 194 | 187 | 178 | 170 |
| DAPA + PBO  | 226 | 221 | 221 | 218 | 215 | 213 | 207 | 204 | 197 | 189 |
